# Supplementary material for: Assessment of subjective emotional valence and long-lasting impact of life events: development and psychometrics of the Stralsund Life Event List (SEL)
Source: Springer Nature journal article supplement (doi:10.1186/s12888-018-1649-3), 2018-04-18
Supplement: MOESM2 [file 15703346]

**Table S3:** Inter-rater and test-retest intraclass coefficient (ICC) reliabilities of the SEL scores

|                                                         | Positive                        |                                 | Negative                        |                                 |
|---------------------------------------------------------|---------------------------------|---------------------------------|---------------------------------|---------------------------------|
|                                                         | Inter-Rater<br>ICC <sup>b</sup> | Test-Retest<br>ICC <sup>b</sup> | Inter-Rater<br>ICC <sup>b</sup> | Test-Retest<br>ICC <sup>b</sup> |
| Basic number of Life Events                             | 0.97***                         | 0.97***                         | 0.92***                         | 0.82**                          |
| Proportion of Life Events<br>rated as positive/negative | 0.73*                           | 0.77*                           | 0.77*                           | 0.73*                           |
| Total Number of Life Events                             | 0.94***                         | 0.97***                         | 0.83**                          | 0.76*                           |
| Emotional Valence<br>(Time of the Interview)            | 0.85**                          | 0.92***                         | 0.96***                         | 0.93***                         |
| Present Impact                                          | 0.41                            | 0.92**                          | 0.75*                           | 0.29                            |
| Social Support                                          | 0.70*                           | 0.82*                           | 0.94***                         | 0.92**                          |
| <b>Averaged</b>                                         | 0.77                            | 0.89                            | 0.86                            | 0.74                            |

\* p-value < 0.05; \*\* p-value < 0.01; \*\*\* p-value < 0.001

<sup>b</sup>Averaged Intraclass Coefficient based on the reliability samples (N=10 resp. 9)
