# Supplementary material for: Assessment of subjective emotional valence and long-lasting impact of life events: development and psychometrics of the Stralsund Life Event List (SEL)
Source: Springer Nature journal article supplement (doi:10.1186/s12888-018-1649-3), 2018-04-18
Supplement: MOESM3 [file 15703346]

1 Table S4: Occurrence agreement of the life event items

| Life Event | Inter-Rater Reliability <sup>a</sup> |       | Test-Retest Reliability <sup>b</sup> |       |
|------------|--------------------------------------|-------|--------------------------------------|-------|
|            | N <sup>c</sup>                       | %     | N <sup>c</sup>                       | %     |
| H1         | 10                                   | 100.0 | 9                                    | 100.0 |
| H2         | 10                                   | 100.0 | 9                                    | 100.0 |
| H3         | 9                                    | 90.0  | 7                                    | 77.8  |
| H4         | 9                                    | 90.0  | 9                                    | 100.0 |
| H5         | 9                                    | 90.0  | 5                                    | 55.6  |
| H6         | 10                                   | 100.0 | 8                                    | 88.9  |
| S8         | 9                                    | 90.0  | 6                                    | 66.7  |
| S9         | 9                                    | 90.0  | 7                                    | 77.8  |
| S10        | 9                                    | 90.0  | 8                                    | 88.9  |
| B12        | 10                                   | 100.0 | 7                                    | 77.8  |
| B13        | 10                                   | 100.0 | 9                                    | 100.0 |
| B14        | 10                                   | 100.0 | 9                                    | 100.0 |
| B15        | 10                                   | 100.0 | 8                                    | 88.9  |
| B16        | 7                                    | 70.0  | 9                                    | 100.0 |
| B17        | 10                                   | 100.0 | 8                                    | 88.9  |
| B18        | 10                                   | 100.0 | 9                                    | 100.0 |
| K20        | 10                                   | 100.0 | 9                                    | 100.0 |
| K21        | 10                                   | 100.0 | 9                                    | 100.0 |
| K22        | 10                                   | 100.0 | 9                                    | 100.0 |
| K23        | 9                                    | 90.0  | 8                                    | 88.9  |
| K24        | 10                                   | 100.0 | 8                                    | 88.9  |
| K25        | 10                                   | 100.0 | 9                                    | 100.0 |
| K26        | 9                                    | 90.0  | 7                                    | 77.8  |
| K27        | 10                                   | 100.0 | 9                                    | 100.0 |
| K28        | 10                                   | 100.0 | 8                                    | 88.9  |
| L30        | 10                                   | 100.0 | 9                                    | 100.0 |
| L31        | 10                                   | 100.0 | 8                                    | 88.9  |
| L32        | 10                                   | 100.0 | 9                                    | 100.0 |
| L33        | 8                                    | 80.0  | 8                                    | 88.9  |
| L34        | 10                                   | 100.0 | 9                                    | 100.0 |
| L35        | 10                                   | 100.0 | 7                                    | 77.8  |
| L36        | 10                                   | 100.0 | 8                                    | 88.9  |
| A38        | 10                                   | 100.0 | 8                                    | 88.9  |
| A39        | 8                                    | 80.0  | 8                                    | 88.9  |
| A40        | 10                                   | 100.0 | 9                                    | 100.0 |
| A41        | 9                                    | 90.0  | 7                                    | 77.8  |
| A42        | 9                                    | 90.0  | 8                                    | 88.9  |
| A43        | 9                                    | 90.0  | 8                                    | 88.9  |
| A44        | 9                                    | 90.0  | 8                                    | 88.9  |
| A45        | 10                                   | 100.0 | 9                                    | 100.0 |
| A46        | 9                                    | 90.0  | 9                                    | 100.0 |
| A47        | 7                                    | 70.0  | 7                                    | 77.8  |

|                                     |     |       |     |       |
|-------------------------------------|-----|-------|-----|-------|
| F49                                 | 10  | 100.0 | 8   | 88.9  |
| F50                                 | 8   | 80.0  | 8   | 88.9  |
| W52                                 | 10  | 100.0 | 8   | 88.9  |
| W53                                 | 7   | 70.0  | 5   | 55.6  |
| J55                                 | 10  | 100.0 | 8   | 88.9  |
| D57                                 | 9   | 90.0  | 8   | 88.9  |
| D58                                 | 9   | 90.0  | 7   | 77.8  |
| D59                                 | 10  | 100.0 | 7   | 77.8  |
| D60                                 | 9   | 90.0  | 8   | 88.9  |
| G62                                 | 9   | 90.0  | 7   | 77.8  |
| G63                                 | 10  | 100.0 | 9   | 100.0 |
| G64                                 | 10  | 100.0 | 7   | 77.8  |
| G65                                 | 9   | 90.0  | 9   | 100.0 |
| T67                                 | 10  | 100.0 | 9   | 100.0 |
| T68                                 | 10  | 100.0 | 9   | 100.0 |
| T69                                 | 9   | 90.0  | 7   | 77.8  |
| T70                                 | 10  | 100.0 | 8   | 88.9  |
| T71                                 | 10  | 100.0 | 9   | 100.0 |
| T72                                 | 10  | 100.0 | 8   | 88.9  |
| T73                                 | 9   | 90.0  | 9   | 100.0 |
| O74                                 | 10  | 100.0 | 9   | 100.0 |
| O75                                 | 9   | 90.0  | 7   | 77.8  |
| O76                                 | 10  | 100.0 | 9   | 100.0 |
| O77                                 | 10  | 100.0 | 8   | 88.9  |
| U78                                 | 6   | 60.0  | 8   | 88.9  |
| U79                                 | 10  | 100.0 | 8   | 88.9  |
| R80                                 | 10  | 100.0 | 9   | 100.0 |
| R81                                 | 10  | 100.0 | 9   | 100.0 |
| $\sum$ discrepancy = 0 <sup>d</sup> | 42  | 60.0  | 28  | 40.0  |
| $\sum$ discrepancy = 1 <sup>e</sup> | 21  | 30.0  | 26  | 37.1  |
| $\emptyset$ agreement               | 9.4 | 94.3  | 8.1 | 90.0  |

- 2 <sup>a</sup>Based on the inter-rater reliability sample (N=10), <sup>b</sup>Based on the test-retest reliability sample (N=9),  
3 <sup>c</sup>Number of subjects with identical occurrence ratings (yes/no), <sup>d</sup>Sum of life events with identical occurrence ratings for all  
4 subjects, <sup>e</sup>Sum of life events with identical occurrence ratings for 90% of the subjects (n=9 resp. n= 8)
