# Supplementary material for: Assessment of subjective emotional valence and long-lasting impact of life events: development and psychometrics of the Stralsund Life Event List (SEL)
Source: Springer Nature journal article supplement (doi:10.1186/s12888-018-1649-3), 2018-04-18
Supplement: MOESM4 [file 15703346]

1 **Table S5: Reliability of the occurrence time coding of selected life events<sup>1</sup>**

| Abbr.           | Life Event<br>Short Description               | Inter-Rater<br>Reliability | Test-Retest<br>Reliability |
|-----------------|-----------------------------------------------|----------------------------|----------------------------|
|                 |                                               | $\kappa$ (SD)              | $\kappa$ (SD)              |
| H3              | Arguments with parents                        | 0.65(0.30)*                | -                          |
| H5              | Arguments between parents                     | 0.87(0.31)**               | -                          |
| H6              | Move out of childhood home                    | 0.43(0.28)                 | 0.36(0.27)                 |
| S8              | Broke up of long-term friendship              | 0.74(0.30)**               |                            |
| S10             | Cut back on leisure activities                | -                          | 0.46(0.31)                 |
| B12             | Heartache                                     | 0.83(0.30)**               | -                          |
| B13             | Serious relationships                         | 0.67(0.28)**               | 0.92(0.33)**               |
| B14             | Marriage                                      | 1.00(0.32)***              | 0.78(0.33)**               |
| B16             | Serious crisis in relationships               | 0.42(0.25)*                | 0.69(0.30)*                |
| B17             | Separations and divorces                      | 0.96(0.31)**               | 0.71(0.31)*                |
| B18             | Unfaithful relationship                       | 1.00(0.32)***              | -                          |
| K21             | Birth of healthy children                     | 0.98(0.32)***              | 0.97(0.33)**               |
| K25             | Move out of children                          | -                          | 0.90(0.33)**               |
| L31             | Complete traineeship/Pass examinations        | 0.35(0.29)                 | 0.57(0.29)**               |
| L36             | Inability to start desired course of training | 0.95(0.31)**               | 0.80(0.32)**               |
| A39             | Promotion/Professional Success                | -                          | 0.48(0.30)                 |
| A42             | Unemployment/Inability to work                | 0.95(0.32)**               | 0.64(0.33)*                |
| A46             | Overburdened by professional tasks            | 0.69(0.32)*                | 1.00(0.33)**               |
| F49             | Financial problems                            | 0.66(0.32)*                | -                          |
| W52             | Moving/Build a house/Renovation               | 0.67(0.31)*                | 0.24(0.32)                 |
| G62             | Serious bodily illness or accident (self)     | 0.69(0.31)*                | -                          |
| G64             | Serious bodily illness or accident (others)   | 0.96(0.31)**               | 0.80(0.33)**               |
| T69             | Death of important relatives or friends       | 0.52(0.32)*                | 0.55(0.33)*                |
| T70             | Death of a pet                                | 0.96(0.31)***              | -                          |
| O74             | Physical/Sexual abuse by a stranger           | 0.82(0.31)**               | -                          |
| O77             | Witnessed the abuse of a close person         | 0.91(0.31)**               | -                          |
| <b>Averaged</b> |                                               | 0.77(0.20)                 | 0.68(0.22)                 |

2 <sup>1</sup> Life events were selected if present at both time points of reliability measurement for at least 5 interviewees.

3 \* p-value < 0.05; \*\* p-value < 0.01; \*\*\* p-value < 0.001
